# Supplementary figures and images for: Factors Affecting Acoustics and Speech Intelligibility in the Operating Room: Size Matters
Source: PubMed Central journal article supplement — Anesth Analg. 2017 May 19;124(6):1978–85. doi: 10.1213/ANE.0000000000002118 (PMC5432101; doi:10.1213/ane.0000000000002118), 2017-05-19

Supplemental Image 1: Empty OR

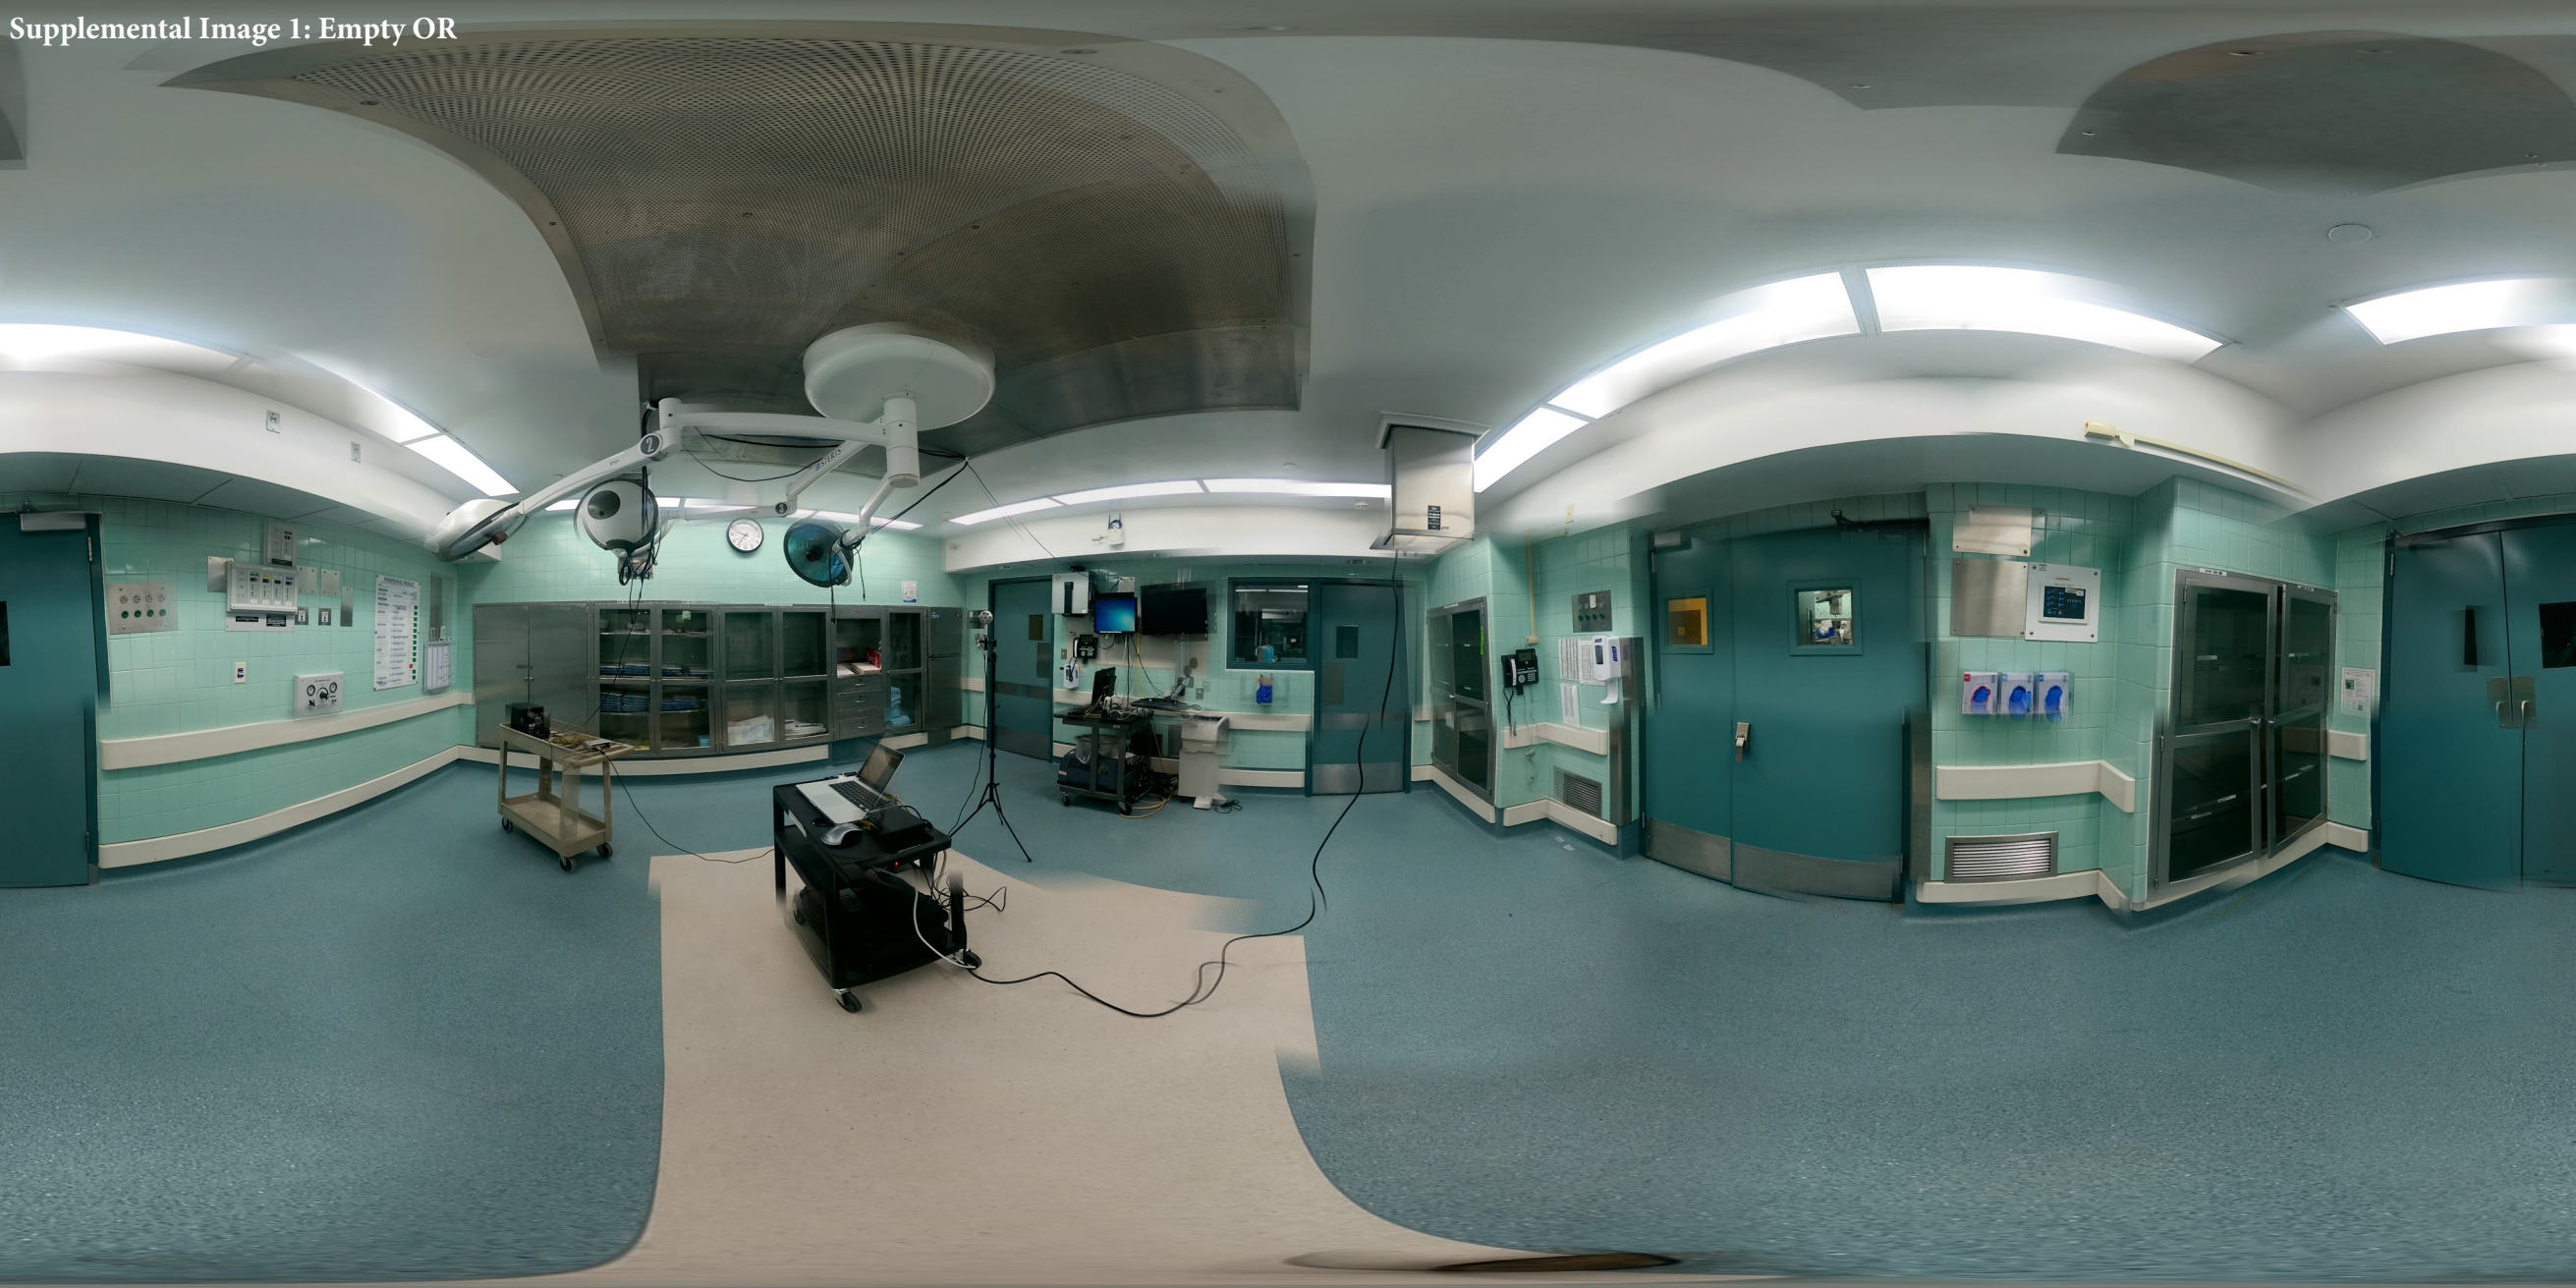

Supplement: ane-124-1978-s002.pdf [file ane-124-1978-s002.pdf]

Supplemental Image 2: Full OR

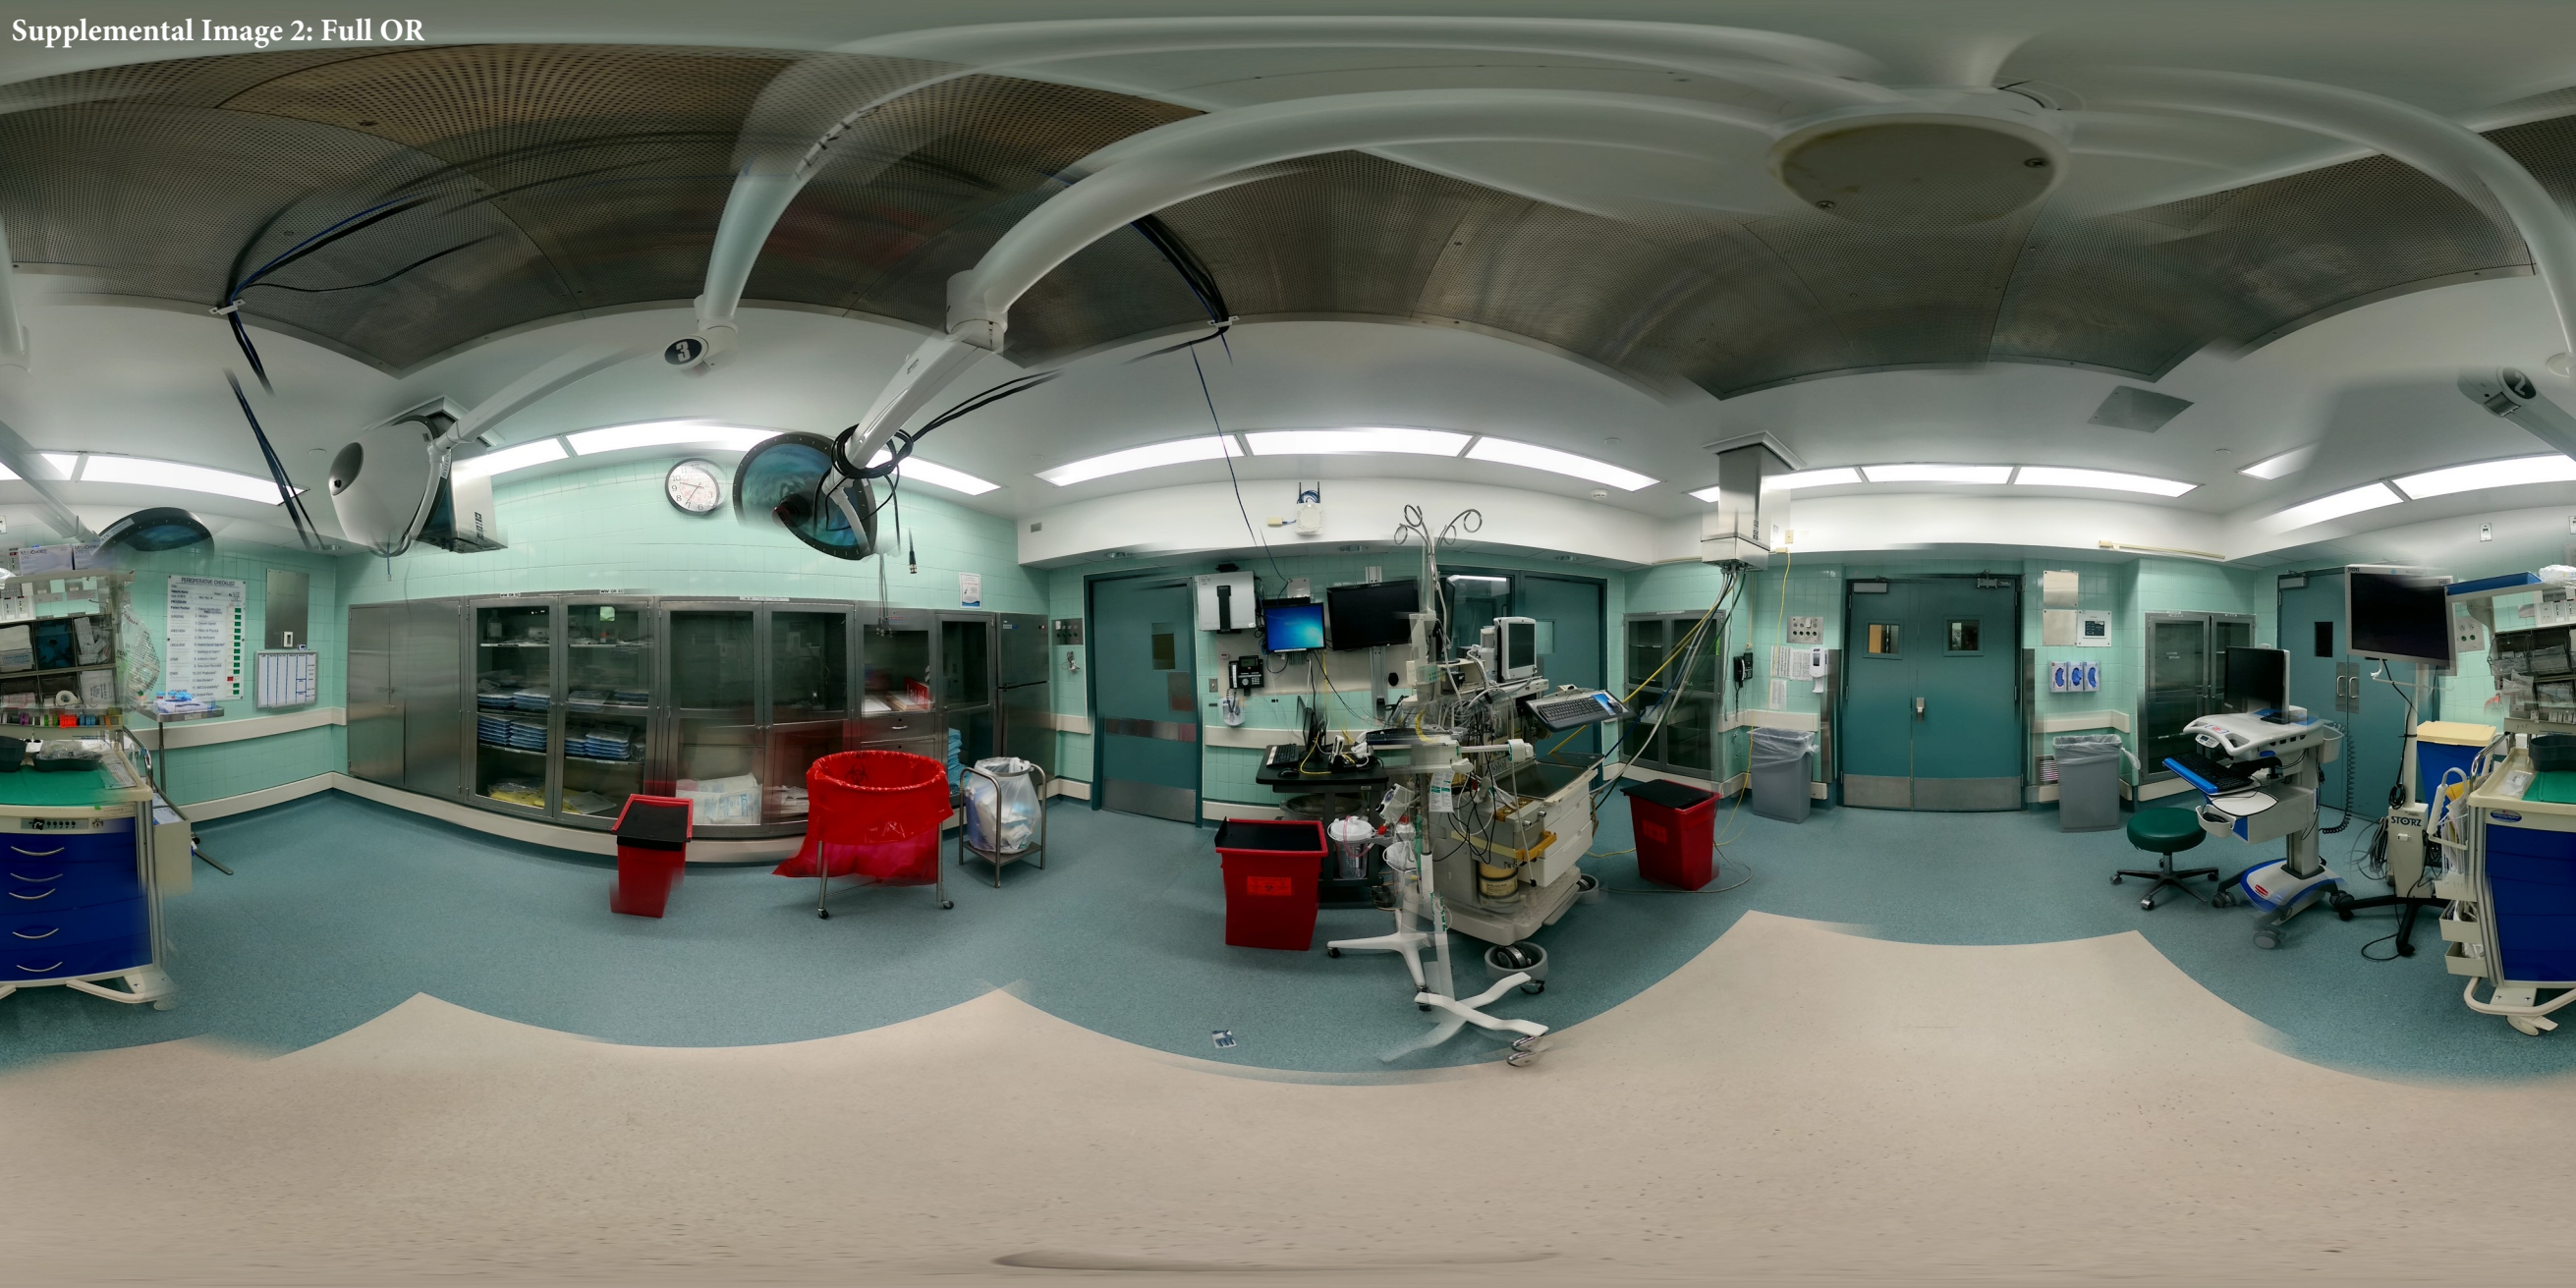

Supplement: ane-124-1978-s003.pdf [file ane-124-1978-s003.pdf]
